# Supplementary material for: Development and Bio-Predictive Evaluation of Biopharmaceutical Properties of Sustained-Release Tablets with a Novel GPR40 Agonist for a First-in-Human Clinical Trial
Source: MDPI journal article supplement (doi:10.3390/pharmaceutics13060804), 2021-05-28
Supplement: s1 [file s1]

# Supplementary Materials: Development and Bio-Predictive Evaluation of Biopharmaceutical Properties of Sustained-Release Tablets with a Novel GPR40 Agonist for a First-in-Human Clinical Trial

Ewelina Juszczyk, Kamil Kisło, Paweł Żero, Ewa Tratkiewicz, Maciej Wieczorek, Jadwiga Paszkowska, Grzegorz Banach, Marcela Wiater, Dagmara Hoc, Grzegorz Garbacz, Jarosław Szodrok and Dorota Danielak

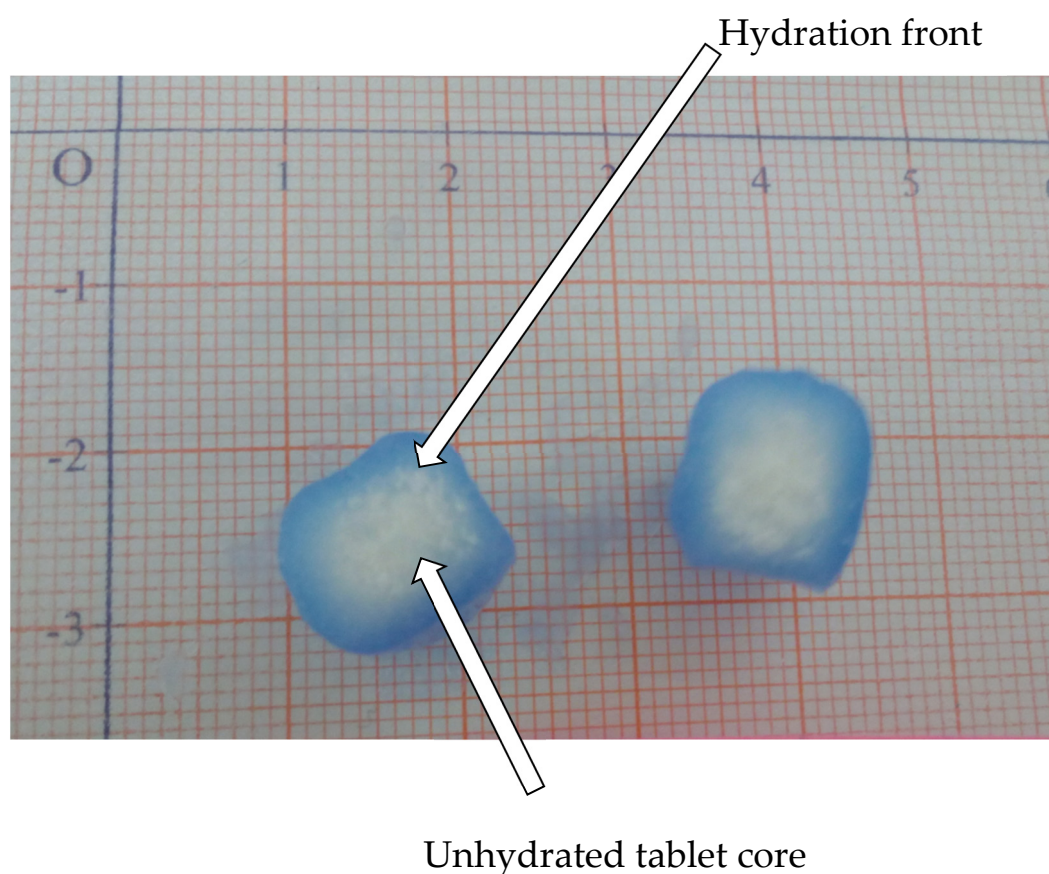

**Figure S1.** A sample cross-section of a formulation after incubation in the test medium, as described in Section 2.2.2 of the manuscript. The photograph depicts the final formulation containing 120 mg API (Final-120) after 5 h incubation in FaSSIF. The addition of the colorant to the medium allowed visualization of the hydration front.



**Table S1.** Composition of developed formulations A-K and the final one. The values are presented as mass percentages of the total mass of the tablet.

[illegible]
